# Supplementary material for: The effects of trees on soil properties and carbon storage in spatially distributed agroforestry systems in northwestern India
Source: Research Square preprint supplement (doi:10.21203/rs.3.rs-6841363/v1), 2025-07-04
Supplement: Supplementary file 1 [file 4b510ac3ca2e7e053155b8bc.docx]

**Supplementary Table A1** Diversity of agroforestry systems, associated trees and agricultural crop species recorded in different agroclimatic zones of Rajasthan.

| ACZ* | Tree based agroforestry | Number of associated tree species | Agricultural crops |
| --- | --- | --- | --- |
| IA | *P. cineraria, P. juliflora, S. oleoides, Senegalia senegal*, *T. undulata*, *V. tortilis* and *Zizyphus mauritiana* | *A. excelsa, A. indica, C. decidua, P. cineraria, P. juliflora*  *S. oleoides, S. senegal*, *T. undulata, V. nilotica*, *V. tortilis*, and *Z. mauritiana* | *Arachis hypogea*, *Brassica nigra*, *Cuminum cymium*, *Cyamopsis tetragonoloba*, *Eruca sativa*, *Hordeum vulgare*, *Pennisetum typhoides*, *Plantago ovata* and *Triticum aestivum* |
| IB | *Dalbergia sissoo*, *V. nilotica*,and *V. tortilis* | *A. excelsa, A. indica, P. cineraria, C. decidua, D. sissoo,*  *T. undulata, S. oleoides, V. leucophloea, V. nilotica*, *V. tortilis* and *Z. mauritiana* | *B. nigra, C. tetragonoloba*,  *Gossypium hirsutum,* *Oryza sativa*, *T. aestivum*, and *Vigna radiata* |
| IC | *D. sissoo*, *P. cineraria,*  *T. undulata* and *Z. mauritiana* | *A. excelsa*, *A. indica, C. decidua, P. cineraria, S. oleoides*, *S. senegal*, *T. undulata V. nilotica*, *V. tortilis, Z. mauritiana* | *A. hypogea*, *C. tetragonoloba*, *P. typhoides* and *V. radiata* |
| IIA | *Ailanthus excelsa, A. indica, P. cineraria,* *T. undulata* and *V. nilotica* | *A. excelsa, A. indica, C. decidua, D. sissoo, P. cineraria, S. oleoides S. senegal*, *V. luecophloea, V. nilotica, V. tortilis*, *T. undulata, Z. mauritiana* | *C. tetetragonoloba*, *P. typhoides* *V. radiata* and *V. unguiculata* |
| IIB | *A. indica, P. cineraria, S. oleoides,* *V. leucophloea, V. nilotica* var. *cupressiformis* and *Z. mauritiana* | *A. excelsa, A. indica, C. decidua, P. cineraria, P. juliflora* *S. oleoides, S. senegal*, *T. undulata, V. nilotica, V. tortilis, Z. mauritiana* | *B. nigra*, *Cicer arietinum*, *H. vulgare*, *P. ovata*, *Sorghum vulgare*, *V. radiata*, *P. typhoides* |
| IIIA | *A. excelsa, A. indica,*  *V. nilotica,* and *V. nilotica* var. *cupressiformis* | *A. excelsa, A. indica, D. sissoo, P. cineraria, S. oleoides V. leucophloea, V. nilotica,* and *Z. mauritiana* | *A. hypogea*, *C. tetragonoloba*,  *C. arietinum, H. vulgare*, *P. typhoides* and *T. aestivum* |
| IIIB | *A. excelsa, A. indica* and *V. nilotica* | *A. excelsa A. indica, D. sissoo, P. cinerari,* and *V. leucophloea* | *B. nigra, P. typhoides*, and  *T. aestivum* |
| IVA | *V. leucophloea* and  *V. nilotica* | *A. indica, P. cineraria, S. oleoides*, *V. nilotica, Z. mauritiana* | *G. hirsutum*, *Lens culinaris*,  *S. vulgare*, *T. aestivum* and *Zea mays* |
| IVB | *A. indica, T. grandis* and *V. nilotica* | *A. excelsa, A. indica, D. sissoo, P. cineraria, V. leucophloea, V. nilotica* | *Glycine max*, *T. aestivum* and  *Z. mays* |
| V | *V. nilotica*) | *A. excelsa, A. indica, D. sissoo, P. cineraria,* and *V. leucophloea* | *C. sativum*, *G. max, O. sativa*, *T. aestivum* and *V. mungo* |

*ACZ agroclimatic zones. IA Arid North Western Sandy Plain, IB Irrigated North Western Plain, IC Hyper Arid Partial Irrigated Zone, IIA Transitional Plain of Inland Drainage, IIB Alluvial Plain of Luni Basin, IIIA Semi-arid Eastern Plain, IIIB Flood Prone Eastern Plain, IVA Sub-humid Southern Plain and Aravallis, IVB Humid Southern Plain, and V Humid South Eastern Plain.

**Supplementary Table A2** Effect of tree species and distance from the tree trunk on soil properties in different agroforestry systems in Rajasthan. Values are means of multiple replications.

| Tree species | Zone# | Soil parameters | | | | | | C stock  (Mg ha-1) |
| --- | --- | --- | --- | --- | --- | --- | --- | --- |
| pH | EC (dSm-1) | SOC (%) | Total N (%) | PO4-P (mg kg-1) | K (mg kg-1) |
| *A. excelsa* | C | 8.06 | 1.27 | 0.168 | 0.07 | 4.91 | 115 | 6.83 |
| NT | 8.14 | 1.08 | 0.188 | 0.07 | 5.25 | 88 | 7.68 |
| CE | 8.18 | 1.20 | 0.193 | 0.07 | 5.11 | 86 | 7.88 |
| *A. indica* | C | 7.83 | 0.84 | 0.191 | 0.09 | 4.75 | 101 | 8.32 |
| NT | 7.73 | 0.85 | 0.206 | 0.11 | 5.28 | 143 | 8.95 |
| CE | 7.82 | 0.84 | 0.211 | 0.10 | 5.60 | 135 | 9.21 |
| *D. sissoo* | C | 8.10 | 1.67 | 0.221 | 0.09 | 2.76 | 196 | 8.98 |
| NT | 8.09 | 1.75 | 0.241 | 0.09 | 2.97 | 201 | 9.65 |
| CE | 8.12 | 1.72 | 0.286 | 0.11 | 3.11 | 172 | 11.47 |
| *P. cineraria* | C | 8.14 | 0.92 | 0.124 | 0.06 | 4.08 | 132 | 5.70 |
| NT | 8.07 | 1.04 | 0.151 | 0.06 | 4.26 | 165 | 6.92 |
| CE | 8.12 | 0.96 | 0.159 | 0.07 | 4.29 | 140 | 7.31 |
| *P. juliflora* | C | 7.92 | 0.26 | 0.086 | 0.03 | 3.12 | 210 | 4.03 |
| NT | 7.92 | 0.22 | 0.102 | 0.05 | 3.24 | 219 | 4.77 |
| CE | 7.96 | 0.23 | 0.107 | 0.05 | 3.32 | 199 | 5.02 |
| *S. oleoides* | C | 8.12 | 1.35 | 0.131 | 0.06 | 3.67 | 126 | 6.03 |
| NT | 7.95 | 1.00 | 0.141 | 0.08 | 3.92 | 159 | 6.49 |
| CE | 8.24 | 1.24 | 0.156 | 0.08 | 4.20 | 121 | 7.16 |
| *S. senegal* | C | 8.46 | 1.11 | 0.128 | 0.08 | 3.21 | 133 | 5.88 |
| NT | 8.38 | 1.19 | 0.145 | 0.08 | 3.45 | 128 | 6.66 |
| CE | 8.47 | 1.11 | 0.144 | 0.08 | 3.53 | 136 | 6.65 |
| *T. undulata* | C | 8.28 | 0.88 | 0.120 | 0.05 | 3.73 | 128 | 5.53 |
| NT | 8.22 | 0.91 | 0.127 | 0.05 | 3.99 | 139 | 5.88 |
| CE | 8.23 | 0.91 | 0.137 | 0.06 | 4.00 | 133 | 6.34 |
| *T. grandis* | C | 8.18 | 0.15 | 0.503 | 0.22 | 6.82 | 98 | 22.50 |
| NT | 7.07 | 0.11 | 0.507 | 0.23 | 7.38 | 96 | 22.65 |
| CE | 7.32 | 0.19 | 0.523 | 0.25 | 7.07 | 105 | 23.39 |
| *V. luecophloea* | C | 7.62 | 0.67 | 0.283 | 0.10 | 4.63 | 96 | 12.79 |
| NT | 7.64 | 0.86 | 0.296 | 0.10 | 5.24 | 123 | 13.37 |
| CE | 7.52 | 0.70 | 0.305 | 0.10 | 5.14 | 105 | 13.76 |
| *V. nilotica* var. *cupressiformis* | C | 8.14 | 1.04 | 0.114 | 0.07 | 3.38 | 65 | 4.59 |
| NT | 8.00 | 1.18 | 0.119 | 0.08 | 3.48 | 70 | 4.59 |
| CE | 7.99 | 0.89 | 0.132 | 0.09 | 3.84 | 71 | 5.10 |
| *V. nilotica* | C | 8.04 | 0.94 | 0.298 | 0.11 | 5.96 | 139 | 11.53 |
| NT | 7.91 | 1.25 | 0.325 | 0.12 | 6.48 | 169 | 12.57 |
| CE | 8.03 | 1.07 | 0.338 | 0.12 | 6.34 | 155 | 13.10 |
| *V. tortilis* | C | 8.02 | 0.35 | 0.098 | 0.06 | 3.10 | 168 | 4.45 |
| NT | 7.86 | 0.34 | 0.109 | 0.07 | 3.48 | 232 | 4.95 |
| CE | 7.94 | 0.29 | 0.119 | 0.07 | 3.28 | 190 | 5.39 |
| *Z. mauritiana* | C | 8.37 | 1.17 | 0.117 | 0.07 | 3.51 | 118 | 5.37 |
| NT | 8.39 | 1.56 | 0.137 | 0.08 | 3.96 | 139 | 6.29 |
| CE | 8.42 | 1.16 | 0.127 | 0.07 | 3.95 | 131 | 5.83 |
| F value of Two-way ANOVA | | | | | | | | |
| System (S) | | 51.31** | 26.28** | 46.96** | 36.73** | 30.66** | 12.58** | 40.71** |
| Distance (D) | | 2.21ns | 0.45ns | 2.39ns | 4.68** | 2.01ns | 3.09* | 2.61ns |
| S × D | | 0.81ns | 0.66ns | 0.14ns | 0.32ns | 0.10ns | 0.81ns | 0.11ns |

#C = control; NT = near tree; CE = canopy edge.

ns = non-significant at p<0.05, * = significant at p<0.05; ** = significant at p <0.01
